# Supplementary material for: Pharmacophylogenetic relationships of genus Dracocephalum and its related genera based on multifaceted analysis
Source: Front Pharmacol. 2024 Oct 3;15:1449426. doi: 10.3389/fphar.2024.1449426 (PMC11484080; doi:10.3389/fphar.2024.1449426)
Supplement: Supplementary file 4 [file Table4.xlsx]

## Sheet: D. moldavica
Terpenoids	Flavonoids	Phenylpropanol	Phenolic acid	Others
(1 R, 2 R, 4S)-1,8-epoxy-p-menthan-2-O-β-D-glucopyranosyl-(1→4)-β-D-glucopyranoside	3-hydroxyflavone	(7R,8S)-dihydrodehydro-diconiferyl-alcohol 4-O-β-D-glucopyranoside	3,5-dihydroxyphenethyl alcohol 3-O-β-D-glucopyranoside	1-(2-methylbutanol)-2-pentyl-1,3-cyclohexadiene
(10S, 16S)–12, 16–epoxy–11, 14–dihydroxy–17(15→16)–abeo-abieta–8, 11, 13–trien–7–one	8-hydroxy-salvigenin	(7S, 8R)-3'-demethyl-dehydrodiconiferyl alcohol-3'-O-β-D-glucopyranoside	3–4-Hydroxybenzoic acid	1-octen-3-ol
(1R, 3R, 4R)-p-methane-3,8-diol 3-O-β-D-glucoside	acacetin	(7S,8R)-dehydrodiconiferyl alcohol-4-O-β-D-glucopyranoside	3-Hydroxybenzoic acid	1-octen-3-yl acetate
(1R, 3S, 4S, 5R)-(-)-1,8-epoxy-p-menthan-5-ethoxycarbonyl-3-O-β-D-glucopyranoside	Acacetin 7-(6''-acetylglucoside)	(7S,8R)-dehydrodiconiferyl alcohol-9'-O-β-D-glucopyranoside	4-Hydroxybenzoic acid	2E,4E-heptadienal
(1S, 2S, 4R)-p-menthane-1,2,8-triols	Acacetin-7-O-glucoside	(E)-3-[2-(3,4-dihydroxyhenyl)-7-hydroxy-3-methoxycarbonyl-2,3-dihydro-1-benzofuran-5-yl]prop-2-enoate	d-pinoresinol	2-octa-2',4',6'-atriynenaphthalene
(1S,3R,4R)-trans-3-hydroxy-1,8-cineole β-D-glucopyranoside	acacetin-7-O-β-D-glucopyranoside	2- Hydroxycinnamic acid	Epicatechin	3'-O-β-D-glucopyranosyl-melampyroside
(3R, 10S, 16S)–12, 16–epoxy–3, 11, 14–trihydroxy–17(15→16), 18(4→3)–diabeo–abieta–4(19), 5, 8, 11, 13–pentaen–7–one	acacetin-7-O-β-D-glucuronide	3-benzofurancarboxylic acid-2-(3,4-dihydroxyphenyl)-7-hydroxy-5-(3-methoxy-3-oxo-1-propenyl)-methyl ester	epi-pinoresinol	4-methylene isophorone
(3S, 4R, 10S, 16S)–3, 4, 12, 16–diepoxy–11, 14–dihydroxy–17 (15→16), 18(4→3)–diabeo– abieta–5, 8, 11, 13–tetraene–7–one	apigenin	3-hydroxy-2[4-(3-hydroxy-1-propen-1-yl)-2-methoxyphenoxy]propyl β-D-glucopyranoside	Gallic acid	6-Methyl-5-hepten-2-one
(Z)- β-ocimene/cis-ocimene	apigenin-7-O-β-D-galactoside	3-Hydroxycinnamic acid	Gastrodin	Allo-ocimene
1,10-di-epi-cubenol	apigenin-7-O-β-D-glucoside	4-Hydroxycinnamic acid	Pyrocatechol	Benzaldehyde
28-nor-3β,18β-dihydroxyurs-12-ene	astragalin	4-Hydroxycoumarin	Pyrogallol	Benzene acetaldehyde
2E,6E-Farnesol	chrysoeriol	7′R, 8′R-dracomolphin A	Resveratrol acid	Benzoic acid
2Z,6E-Farnesol	diosmetin	7′R, 8′S-dracomolphin A	Salicylic acid	Benzyl alcohol 7-O-α-L-arabinopyranosyl-(1→2)-β-D-glucopyranoside
2α,3α-dihydroxy-12-en-28-ursolic acid	gardenin A	7′S, 8′R-dracomolphin A	Syringic acid	Benzyl β-D-arabinopyranosyl-(1→6)-β-D-glucopyranoside
3-Thujopsanone	gardenin B	7′S, 8′S-dracomolphin A	Tannic acid	Benzyl β-D-xylopyranosyl-(1→6)-β-D-glucopyranoside
akequintoside A	Hesperetin	acanthoside B	Vanillic acid	Bergamal
Aromadendrene	Hesperidin	Caffeic acid	(5R, 10S, 16R)–11,16–dihydroxy–12–methoxy–17(15 → 16)– abeoabieta–8, 11, 13–triene–3, 7–dione	Citric acid
Carvacrol	isorhamnetin	Catechin	Caryopincaolide F	Dibutyl phthalate
Caryophyllene oxide	Kaempferol	Chlorogenic acid	(5R,10S,16R)–11,16–dihydroxy–12–methoxy–17(15→16)– abeoabieta–8, 11, 13–triene–3, 7–dione	Dihydro-β-ionone
cassipourol	Luteolin	cis-1-(3-hydroxy-4-methoxyphenyl)-2-butene-4-O-α-L-rhamnopyranosyl-(1→3)-O-β-D-glucopyranoside		Eicosane
cis-linalool oxide	Naringenin	citrusin A		E-β-ionone
cis-Phytol	Naringin	Citrusin C		falcarinol
Citronellal	quercetin	Coniferin		linarionoside B
Dracocephalumoid A	Quercitrin	dracomolphin B		Malic acid
Dracocephalumoid B	Rutin	dracomolphin C		melampyroside
Dracocephalumoid C	salvigenin	dracomolphin D		Methyl hexadecanoate
Dracocephalumoid D	scrophulein	dracomolphin E		n-hexadecane
Dracocephalumoid E		Esculetin		Palmitic acid (n-Hexadecanoic acid)
E,E-α-farnesene		E-ρ-methoxy cinnamaldehyde		Quinic acid
Epi-α-muurolol/τ-Muurolol		Ferulic acid		Succinic acid
Ethyl linoleate		hedyotisol A		Tectoionol A
Eucalyptol		hedyotisol B		Tetradecanoic acid
euscaphic acid		methyl (Z)-3-(4-hydroxy-3-methoxyphenyl)-2-{2-methoxy-4[(E)-3-methoxy-3-oxoprop-1-enyl]phenoxy}-prop-2-enoate		α-Calacorene
E-β-farnesene		Methyl chavicol/ Estragole		β-Thujaplicinol
gardoside methyl ester		Methyl eugenol
Geranial/ Citral a		oresbiusin B
Geranic acid		Pinoresinol
Geraniol		pinoresinol-4-O-β-D-glucopyranoside
Geranyl acetate/Geraniol acetate		Rosmarinic acid
Geranyl formate		rosmarinic acid ethyl ester
Germacrene D		rosmarinic acid methyl ester
Hexahydrofarnesyl acetone/6,10,14-Trimethyl-2-pentadecanone		Schitenoside C
Isophytol		Sinapic acid
komarovin B		syringaresinol
Ledol/(+)-ledol		trans-chrysanthemal
limonen-10-ol 10-O-β-D-glucopyranoside
Limonene
Linalool
Myrcene (β-myrcene)
Neophytadiene
Neral/ Citral b
Nerol
Nerol oxide
Nerolic acid
Neryl acetate
para-cymene/p-Cymene
Spathulenol
Terpinolene
Thymol
trans-linalool oxide
trans-ocimene
Uncinatone
α-Amorphene
α-Copaene
α-Humulene
β-Bourbonene
β-Caryophyllene
β-Copaene
γ-cadinene
δ-Cadinene

## Sheet: D. heterophyllum
Terpenoids	Flavonoids	Phenylpropanol	Phenolic acid	Others
(-)-Myrtenyl acetate	Apigenin-7-O-rutinoside	Acteoside	Drahebenine= 2-methoxy-4-(2,2,5-trimethyl-2H-imidazol-4-yl)phenol	(1E)-1-Octenyl acetate
(-)-Spathulenol	Chrysosplenetin	dehydrodiconiferyl alcohol-9-O-β-D-glucopyranoside	Salicylic acid/2-hydroxybenzoic acid	(3Z,13Z)-2-Methyloctadeca-3,13-dien-1-ol
(-)-trans-Pinocarvyl acetate	Diosmetin	ethyl rosmarinate	Vanillic acid/3-methoxy-4-hydroxybenzoic acid	1,2-Dimethylbenzene
(+)-trans-Chrysanthenyl acetate	Drahebephins A=5,7,3',4'-tetrahydroxy-6-(2-oxopyrrolidin-5-yl)-flavone	methyl rosmarinate/rosmarinic acid methyl este		1,4-Dimethylbenzene
1-(6.6-Dimethylbicyclo[3.1.0]hex-2-en-2-yl)-ethanone	Drahebephins B=5,7,3',4' -tetrahydroxy-8-(2-oxopyrrolidin-5-yl)-flavone	Rosmarinic acid		1-Dodecyn-4-ol
1,5,5,8-Tetramethyl-12-oxabicyclo[9.1.0]dodeca-3,7-diene	Kaempferol	Safrole (4-Allyl-1,2-(methylenedioxy)-benzene)		1-Dodecyne
1,5,9,9-Tetramethyl-1,4,7-cycloundecatriene	Luteolin			1-Nonyne
1,5-Dimethyl-1,5-cyclo-octadiene	Luteolin-5-O-β-D-glucoside			1-octen-3-ol
1-Ethenyl-1-methyl-2,4-bis(1-methylethylidene)cyclohexane	Luteolin-7-O-rutinoside			2-(2-Methyl)-4-methyltetrahydropyran
1-Isopropyl-4-methylbicyclo[3.1.0]hex-2-ene				2,3-Dimethyl-1,5-heaxadiene
2,3,3-Trimethyl-3-cyclopentene-1-acetaldehyde				2,4-Decadienal
2,3,6-Trimethyl-1,5-heptadiene				2,4-Nonadienal
2,3,6-Trimethyl-3-hepten-1-ol				2,6,10,15-Tetramethylheptadecane
2,6-Dimetyl-6-(4-methyl-3-pentenyl)-2-norpinene				2,6-Dimethyl-1,3,5-triene
2,7,10-Trimethyldodecane				2-Isoproplidene-3-methyl hexa-3,5-dienal
2-Isopropenyl-5-methyl-4-hexenal				2-Isopropyl-5-ethylhex-2-enal
2-Pinen-4-ol, trans				2-Methyl-1-nonene-3-yne
2-Pinen-4-one				2-methyl-3-phenylpropanal
2α-dihydroxy ursolic acid				2-Methyl-butanoic acid,(Z)-3-hexenyl ester
2α-hydroxyoxyursoursolic acid				2-Methylene-5α-cholestan-3α-ol
3,3,5-Trimethyl-1,4-hexadiene				3,7-Dimethyl-2, 6-octen-1-ol
3-Isopropenyl-5-methyl-1- cyclohexene				3-Methyl-1-pentanol
3-Pinanone				4,4,7a-Trimethyl-5,6,7,7a-tetrahydro-benzofuranone
4,11,11-Trimethyl-8-methylenebicyclo[7.2.0]undec-3-ene				4,8-Dimethyl-1,7-nonadien-4-ol
4-Isopropylidene-1-vinyl-o-menth-8-ene				4,8-Dimethyl-1,7-nonadiene
5-Isopropyl-2-methyl bicyclo(3.1.0)hexan-2-ol				4,8-Dimethyl-3,7-nonadien-2-ol
6,6-Dimethyl-2-methylenebicyclo[3.1.1]heptane				4-Hydroxy-4-methyl-2-pentanone
6,8,8-Trimethyl-2-methylene-tricyclo[5.2.2.0(1,6)]undecan-3-ol				4-Methyl-6-hepten-3-one
Azulenol				5,9-Dimethyl-1-decanol
Betulin				5,9-Dimethyl-1-octen-1-ol
Betulinic acid				6-Hepten-3-ol
Cadina-1(10),4-diene				6-Methyl-5-hepten-2-ol
Calarene				6-Methyl-5-hepten-2-one
Caryophyllene				9,12-Octadecadienonic acid, ethyl ester
Caryophyllene oxide				Acetic acid
Chrysanthenone				Benzaldehyde
cis-linalool oxide				Benzenemethanol,a,a,4-trimethyl-
cis-Ocimene				cis-1,4-Undecadiene
cis-Rose oxide				cis-3-Hexenol
cis-Verbenol				Dibutyl phthalate
cis-Z-α-Bisabolene epoxide				Eicosane
Citronellal				Ethylbenzene
Citronellene				Hexadecanoic acid
Citronellic acid				Isopentyl alcohol
Citronellol				Isopropenyl acetate
Citronellyl acetate				Methy (11E,14E)-11,14-icosadienoate
Citronellyl butyrate				Methyl hexadecanoate/Hexadecanoic acid,methyl ester
Citronellyl formate				Nonanal
Copaene				o-Cymene/1-Methyl-2-(1-methylethyl)-benzene
Cubenol				Palmitic acid,ethyl ester
Decahydro-1,1,4,7-tetramethyl-4aH-cyclopropa[e]azulen-4a-ol				Pentadecane
Dihydro-myrcenol				Pentyl alcohol
D-Limonene				Phenethyl alcohol-8-O-β-D-glucopyranoside
Epi-α-muurolol/τ-Muurolol				Propanone-2
Eucalyptol/1,8-Cineole/Cineole				Sabina ketone
Eudesma-4(14),11-diene				Santolina triene
Farnesol				Vitamin A aldehyle
Geranial/ Citral a				Vomifoliol
Geraniol				β-sitosterol
Geranyl acetate
Geranyl formate
Germacrene D
Hexahydrofarnesyl acetone/6,10,14-Trimethyl-2-pentadecanone
Humulene epoxide II
Isoaromadendrene epoxide
Isopinocamphone
Ledene oxide
Linalool
Linalyl acetate (Acetic acid linalool ester)
Longipinene epoxide
Methyl geranate/trans-Geranic acid methyl ester
Myrcene
Nerol
Nerol oxide
Neryl acetate
Oleanolic acid
Palustrol (Decahydro-1,1,4,7-tetramethyl-4aH-cycloprop[e]azulen-4a-ol)
para-cymene/p-Cymene
Pinocarvone (2(10)-Pinen-3-one)
Piperitone
p-Menth-1-en-4-ol,acetate
pomolic acid
Spathulenol
tau-Cadinol/α-epi-Cadinol
Terpinine-4-ol (4-Methyl-1-(1-methylethyl)-3-cyclohexen-1-ol)
Terpinolene (1-Methyl-4-(1-methylethlidene)-cyclohexene)
trans-linalool oxide
trans-Nerolidol
trans-ocimene
trans-Rose oxide
trans-Verbenol
trans-Z-α-bisabolene epoxide
ursolic acid
verbenyl acetate (2,6,6-Trimethyl-bicyclo[3.1.1]hept-2-en-4-ol,acetate)
Viridiflorol
Z-Citral
Z-β-Farnesene
α-Amorphene
α-Bergamotene
α-Bisabolene
α-Bourbonene-
α-Farnesene
α-Humulene
α-Patchoulene
α-Phellandrene
α-Pinene
α-Santalal
α-Terpinolene
α-trans-Bergamotene
β-Bourbonene/Decahydro-3a-methyl-6-methylene-1-(1-methylethyl)-cyclobuta[1.2:3.4]dicyclopentene
β-Calurene
β-Farnesene
β-Phellandrene
β-Pinene
γ-Bisabolene
γ-muurolene
γ-Terpinene
δ-Cadinol

## Sheet: D. peregrinum
Terpenoids	Flavonoids	Phenylpropanol	Phenolic acid	Others
1,8-cineole	3,5,7-trihydroxyl-4'-methoxylflavone-3-O-α-L-rhamnoside	1'-methyl-2'-hydroxyethyl ferulate	Syringic acid	(3β,7α)-Stigmast-5-ene-3,7-diol
Betulin	3,5-dihyroxyl-6,7,3',4'-tetrmethoxy -lflavone	4-O-Caffeoylquinic acid	3-hydroxybenzoic acid	2R-prunin
Betulinic acid	5,3',4'-trihydroxy-3,7-dimethoxyflavone	Caffeic acid	4-hydroxy-3-methoxy benzaldehyde	4-(β-glucopyranosyloxy) benzoic acid
Cadina-1(10),4-diene	5,3',4'-trihydroxyl-3, 7-dimethoxylflavone	caffeotannic acid	Arbutin	Allyl methallyl ether
Carvone	5,6,7,4'-tetrahydroxylflavone-7-O-β-D-glucoside	Chlorogenic acid	benzene-β-D-glucoside	Aromadendrene oxide-(2)
Caryophyllene oxide	5,7,3'-trihydroxyl-4'-methoxylflavone	Dihydrocaffeic acid	Gallic acid	Benzaldehyde
cis-Carveol	5,7-dihydroxyl-4'-methoxyl flavone-7-O-α-L-rhamnosyl(1→6)-β-D-glucoside	ferulic acid	p-hydroxybenzcic acid glucoside	butyl acetate
cis-Sesquisabinene hydrate	5-hydroxy-4',6, 7-trimethoxy-flavone	Methyl caffeate	Protocatechuic acid	carotene
cis-Verbenol	Acacetin	Neochlorogenic acid	Vanillic acid	Daucosterol
Corosolic acid	acacetin-7-O-glcopyranoside	Peregrinumin D	Vanillin	Docosane
Cyclophenchene	Acacetin-7-O-rutinoside (Linarin)	Rosmarinic acid		Furopelargone A
Dehydrosabinene	acacetin-7-O-β-D-glucoside	trans-p-hydroxycinnamic acid/trans-p-coumaric acid/4-Hydroxycinnamic acid/p-Coumaric acid		Hexenal
epi-cubenol	Alpinetin			Isobutyl phthalate
Epi-α-muurolol/τ-Muurolol	Apigenin			Linolelaidic acid
Germacrene D	Diosmetin			Naphthalene
Isoaromadendrene epoxide	Eriodictyol			o-Cumene
limonene	Hesperetin			Peregrinumcin A
Linalool	Isoquercitrin			Phenyl β-D-glucopyranoside
Lupeol	Isorhamnetin			p-Hexadecanoic acid
Myrtenal	kaempferide-3-O-rhamnopyranoside			p-hydroxybenzoate glucoside
Myrtenol	Kaempferol			Prunasin/2R-prunasin
Oleanic acid	kaempferol-3-O-glucoside			Stigmasterol
Perillene	kaempferol-7-O-β-D-glucoside			α-linolenic acid/Linolenic acid
Pinocarvone	kahnisin-3-O-rhamnoside			β-sitosterol
Sabinene	Luteolin
Spathulenol	Luteolin -7-O- (6"-feruloyl) glucoside
Terpinen-4-ol	Luteolin-7-O-glucoside
trans-Pinocarveol	Luteolin-7-O-rutinoside
trans-Verbenol	Naringenin
Ursolic Acid	Peregrinumin A
ursonic acid/3-carbonylursolic acid	Peregrinumin B
α-Bisabolol	Peregrinumin C
α-Bisabolol oxide B	Quercetin
α-Campholenal	Quercetin-7-O-β-D-glucopyranoside
α-Phellandren-8-ol	quercitrin
α-Pinene	Rutin
α-Terpinene	Scutellarein-7-O-glucoside
α-Terpineol
β-Bisabolene
β-Bourbonene
β-Cadinene
β-Caryophyllene
β-Myrcene
β-Pinene
β-thujone
γ-cadinene
γ-Terpinene

## Sheet: D. kotschyi
Terpenoids	Flavonoids	Phenylpropanol	Phenolic acid	Others
(-)-Carvone	Apigenin	Rosmarinic acid		1,1-dimethoxy decane
(-)-Terpinen-4-ol	Apigenin-7-O-glucoside (cosmosiin)	trans-chrysanthemal		1-Adamantanecarbonitrile
(+)-trans-Isolimonene	Calycopterin	Eugenol		3Z-3-Hexenyl benzoate
(Z)- β-ocimene/cis-ocimene	Cirsimaritin			colosolic acid
1,5-Dimethylbicyclo(3.2.1)octan-8-ol	Isokaempferide			Cyclohexylallene
3-Carene/Δ-3-Carene	Luteolin			Cyclooctene, 3-(1-methylethenyl)-
6-Methyl-4,6-bis(4-methylpent-3-en-1-yl)cyclohexa-1,3-dienecarbaldehyde	Luteolin 3’-O-β-D-glucuronide			Isopropyl myristate
6-Octenal, 7-methyl-3-methylene-	Luteolin-7-O-β-D-glucopyranoside			Myristic acid
allo-Aromadendrene epoxide	Penduletin			o-Cymene
Aromadendrene	xanthomicrol			perillyl alcohol
Borneyl acetate				Santene
Camphene				trans-Oleic acid
Camphor				α-campholenaldehyd (α-Campholenal)
Carvacrol				β-sitosterol
Carveol
Carvone
Caryophyllene
Caryophyllene oxide
cis-Carveol
cis-Dihydrocarvone
cis-Limonene oxide
cis-p-Mentha-1(7),8-dien-2-ol
cis-p-Mentha-2,8-dien-1-ol
cis-Thujone
Cyclohexene, 1,5,5-trimethyl-3-methylene-
D-Limonene
Epi-α-muurolol/τ-Muurolol
Eucalyptol/1,8-Cineole/Cineole
Fencholenic aldehyde
Geranial/ Citral a
Geraniol
Geranyl acetate
Germacrene D
Globulol
Isogeranial
Isoneral
Isospathulenol
limonen-10-al
Limonen-10-ol
limonen-10-ol 10-O-β-D-glucopyranoside
limonen-10-ol 10-O-β-D-glucopyra-nosyl-(1→2)-β-D-glucopyranoside
Limonen-10-yl acetate
Limonene
Linalool
Menthyl acetate
Methyl geranate/trans-Geranic acid methyl ester
Myrcene (β-myrcene)
Neral/ Citral b
Nerol
oleanolic acid
para-cymene/p-Cymene
Perilla alcohol
Perilla aldehyde
Pinocarvone
p-Menth-1-en-9-ol
p-mentha-8-en-1,2-diol
Sabinene
Terpinen-4-ol
trans-Carveol
trans-Limonene oxide
trans-p- Mentha-2,8-dien-1-ol
trans-Pinocarveol
trans-p-Mentha-1(7),8-dien-2-ol
trans-Sabinene hydrate
trans-Verbenol
trans-β-Farnesene
ursolic acid
valencene
Verbenene
Verbenone
Veridiflorol
Vulgarol B
Zingiberene
α-Cadinol
α-Campholenal
α-Copaene
α-Cubebene
α-Fenchyl acetate
α-Gurjunene
α-Phellandrene
α-Pinene
α-Terpineol
α-Terpinolene
α-Thujene
β- Turmerone
β-Bisabolene
β-Bourbonene
β-Caryophyllene
β-Elemene
β-Pinene
β-selinene
β-trans-Ocimene
γ-Gurjunene
γ-Terpinene
δ-Cadinene

## Sheet: D. tanguticum
Terpenoids	Flavonoids	Phenylpropanol	Phenolic acid	Others
(-)-trans-Pinocarvyl acetate	5-hydroxy-4'-methoxyflavone-7-O-rutinoside	(E)4-O-[β-D-glucopyranosyl- (1→3)-a-L-rhamnopyranosyl]phenylethylcinnamamide		1,30-Triacontanediol
(+)-2-Isopropenyl-2-Carene	Diosmetin-7-O-α-L-arabinosyl-(1→6)-β-D-glucoside	2-methoxy-4- (2-propen-1-yl)penyl-β-D-glucopyranoside		11-Decyl-tetracosane
(+)-Isomenthol	Diosmetin-7-O-β-D-glucose-(1→6)-β-D-glucoside	2-methoxy-4-(2-propen-1-yl)penyl-6-[(2E)-2- butenoate]-β- D-glucopyranoside		1-Triacontanol
(+)-Pinanediol	diosmetin-7-O-β-D-glucoside	2-methoxy-4-(2-propen-1-yl)penyl-6-acetate-β-D-glucopyranoside		benzyl-6-[(2E)-2-butenoate]-β-D-glucopyranoside
Caryophyllene	Diosmetin-7-O-β-D-xylosyl-(1→6)-β-D-glucoside	Dracotanoside A		Benzyl-β-D-glucopyranoside
Caryophyllene oxide	Luteolin-7-methoxy-3'-O-(3''-O-acetyl)-β-D-glucopyranuronic acid-6''methyl ester	Dracotanoside B		Docosane
Cedrene	Luteolin-7-O-α-L-arabinosyl-(1→6)-β-D-glucoside	Dracotanoside C		Dotriacontane
cis-Linalool	Luteolin-7-O-β-D-glucopyranoside/Luteolin-7-O-β-D-glucoside	Dracotanoside D		dratanguticumide A
cis-Verbenol	Luteolin-7-O-β-D-glucosyl-(1→6)-β-D-glucoside	dratanguticumide B		Eicosanoic acid
cis-Z-α-Bisabolene epoxide	Luteolin-7-O-β-D-xylosyl-(1→6)-β-D-glucoside	dratanguticumide C		Heneicosane
delta-Guaiene	Naringenin 7-O-rutinoside (narirutin)	pectolarigenin		Hentriacontane
D-Limonene	Pectolarigenin			Heptacosane
Elemol				Hexacosane
E-Pinane				Hexatriacontane
Eucalyptol				Linolenic acid, methyl ester
Eucarvone				Nonacosane
Farnesol				Octacosane
Germacrone				Octadecanal
Globulol				Octadecanoic acid
Isoledene				Palmitic acid
Isomenthol				Palmitone
Isopinocamphone				Pentacosane
Isopulegol acetate				Tetracontane
Ledol				Tetracosane
Linalyl acetate				Tetratriacontane
Myrtenal				trans-Oleic acid
Myrtenyl acetate				Triacontane
Ocimene				Vitamin E
Perilla alcohol				γ-Linolenic acid
Phytol				γ-Sitosterol
Sabinene
tau-Cadinol
trans-Pinocarveol
Z-β-Terpineol
α-Caryophyllene
α-Cubebene
α-Limonene diepoxide
α-Linalool
α-Pinene
α-Terpineol
α-Thujene
β-Cymene
β-Elemenone
β-Myrcene
β-Pinene
γ-Elemene
γ-Terpinene

## Sheet: D. forrestii
Terpenoids	Flavonoids	Phenylpropanol	Phenolic acid	Others
(+)-1β,4β,11-trihydroxyoppositane	5,7-dihydroxy-3′,4′-dimethoxyflavone	1-hydroxy-2-O-β-D-glucopyranosyl-4-allylbenzene	3-O-(6-O-p-hydroxybenzoyl)-β-D-glucopyranoside	(−)-12-hydroxyjasmonic acid
(+)-T-cadinol	choerospondin	2-(3-hydroxy-4-methoxyphenyl)ethyl β-D-glucopyranoside	3-O-[6-O-(E)-p-coumaroyl]-β-D-glucopyranoside	28-norlup-20(29)-ene-3β,7β-diol
(+)-α-cadinol	flavoyadorigenin B	3,4,α-trihydroxybutyl phenylpropionate	3-O-[6-O-(Z)-p-coumaroyl]-β-D-glucopyranoside	3,4,5-trimethoxyphenylethanol β-D-glucopyranoside
(1S,2S,4R)-trans-2-hydroxy-1,8-cineole β-D-glucopyranoside_x0002_	Luteolin	3,4-dihydroxyallylbenzene-3-O-α-L-rhamnopyranosyl(1 → 6)-β-D-glucopyranoside	4-hydroxy-3-methoxyphenylethanol 8-O-[(6-O-syringoyl)-β-D-glucopyranoside]	3-epiocotillol II
(3β,18α,19α)-ursane-3,20,28-triol	narirutin	4-O-[β-D-glucopyranosyl-(1 → 3)-α-L-rhamnopyranosyl]phenylethylcinnamamide	benzyl 2-O-β-D-glucopyranosyl 2,6-dihydroxybenzoate	benzyl glucopyranoside
(3β,18β)-20,28-epoxy-3-hydroxyurs-21-en-28-one	scolymoside	9″-O-n-butyl lithospermate	dimethyl lithospermate	cis-3-hexenylglucoside
(3β,18β)-ursane-3,20,28-triol		acanthoside B	dracocephalone A	ethyl β-D-glucopyranoside
1,4,7-eudesmanetriol		caffeic acid	hydroxytyrosal	phenylacetic acid
10(14)-guaiene-4,6-diol		Citrusin C	manglieside B	phenylethyl β-D-glucopyranoside
10-epiteuclatriol		eugenol rutinoside	salidroside	Prunasin/2R-prunasin
11α,12α-epoxyolean-2α,3β,23-trihydroxy-28,13β-olide_x0002_		glochidioboside
12,13-epoxy-28-norursane-3β,17β-diol		methyl rosmarinate
15-isopimaren-8-ol		myzodendrone
15-sandaracopimarene-8,11-diol		oresbiusin A
1S,2S,4S-trihydroxy-p-menthane		sasanquin
1α,6β-dihydroxy-4(14)-eudesmene		sisymbrifolin
1β,10α,4β,5α-diepoxy-7αH-germacran-6β-ol
1β,6β-dihydroxy-4(14)-eudesmene
23-hydroxyursolate
28-norurs-12-en-3β-ol
2-pinen-10-ol myrtenyl β-D-glucopyranoside
3,7-dimethyl-1-octene-3,6,7-triol
3,7-dimethyl-1-octene-3,6,7-triol 6-O-β-D-glucopyranoside
3β,28-dihydroxylup-20(29)-ene
3β-hydroxy-11a,12a-epoxyolean-28,13β-olide
3β-hydroxylup-20(29)-en-28-oic acid
3β-hydroxyurs-11-en-28,13β-olide
3β-hydroxyurs-12-ene-28-al
6,15-epoxy-1,4-eudesmanediol
9-hydroxylinalool
ananosmin
arjunolic acid
Betulin
Betulinic acid
caryolane-1,9β-diol
linaloyl glucoside
nigaichigoside F1
Oleanolic acid
oplopanone
Sugiol
ursolic acid

## Sheet: D. austriacum
Terpenoids	Flavonoids	Phenylpropanol	Phenolic acid	Others
	Acacetin tri-O-hexoside-O-desoxyhexoside	3-O-Caffeoylquinic acid	Anisic aldehyde
	Acacetin-7-O-glucoside	4-O-Caffeoylquinic acid	Cinnamic acid
	Acacetin-O-desoxyhexoside-O-hexoside	5-O-Caffeoylquinic acid	Gentisic acid
	Apigenin-7-O-glucoside (cosmosiin)	Benzyl O-p-coumaroyl-O-desoxyhexoside-O-hexoside	Isovanillic acid
	Apigenin-7-O-rutinoside	Benzyl O-p-coumaroyl-O-hexoside	Lithospermic acid A
	Luteolin	Caffeic acid	Lithospermic acid B
	Luteolin 4' -O-glucoside	Caffeic acid O-hexoside	Lithospermic acid B O-hexoside
	Luteolin-3’ -O-glucoside	Caftaric acid	p-Hydroxybenzoic acid
	Luteolin-7, 4' -di-O-rutinoside	Danshensu O-hexoside	p-Methoxybenzoic acid
	Luteolin-7-O-glucoside (cynaroside)	Ferulic acid	p-Methoxycinnamic acid
	Luteolin-7-O-rutinoside	Isoferulic acid	Protocatechuic acid
	Luteolin-7-O-rutinoside-4' -O-glucoside (cynarotriside)	Nepetamultin A	Syringic acid
	Luteolin-O-desoxyhexoside-O-hexoside	Nepetamultin A O-hexoside	Vanillic acid/3-methoxy-4-hydroxybenzoic acid
	Luteolin-tri-O-hexoside-di-O-desoxyhexoside	Rosmarinic acid	Vanillin
		Rosmarinic acid di-O-methyl ester	Veratric acid
		Schizotenuin A
		trans-p-hydroxycinnamic acid/trans-p-coumaric acid/4-Hydroxycinnamic acid/p-Coumaric acid

## Sheet: D. botryoides
Terpenoids	Flavonoids	Phenylpropanol	Phenolic acid	Others
	Acacetin-7-O-glucoside	1,3-Di-O-Caffeoylquinic acid	4-Hydroxybenzoic acid 4-O-glucoside
	Apigenin	3-O-Caffeoylquinic acid	4-Hydroxybenzoic acid O-hexoside-O-malonyl ester
	Apigenin O-hexoside-di-O-acetyl ester	4-O-Caffeoylquinic acid	Anisic aldehyde
	Apigenin-7-O-(4”-malonyl-6”-O-acetyl)-glucoside	5-O-Caffeoylquinic acid	Cinnamic acid
	Apigenin-7-O-(6”-O-acetyl)-glucoside	Danshensu	Gentisic acid
	Eriodictyol	Danshensu O-acetyl ester	Isovanillic acid
	Eriodictyol 7-O-rutinoside (eriocitrin)	Ferulic acid	Lithospermic acid B
	Eriodictyol-7-O-glucoside	Isoferulic acid	Lithospermic acid B O-hexoside
	Luteolin	Nepetamultin A	p-Hydroxybenzoic acid/4-Hydroxybenzoic acid
	Luteolin 4' -O-glucoside	Nepetamultin A O-hexoside	p-Methoxybenzoic acid
	Luteolin-7-O-(2”,6”-di-O-acetyl)-hexoside	Rosmarinic acid	p-Methoxycinnamic acid
	Luteolin-7-O-(6”-O-acetyl)-glucoside	trans-p-hydroxycinnamic acid/trans-p-coumaric acid/4-Hydroxycinnamic acid/p-Coumaric acid	Protocatechuic acid
	Luteolin-7-O-glucoside (cynaroside)		Syringic acid
	Luteolin-7-O-rutinoside (scolymoside)		Vanillic acid/3-methoxy-4-hydroxybenzoic acid
	Luteolin-O-desoxyhexoside-O-hexoside		Vanillin
	Naringenin		Veratric acid
	Naringenin 7-O-glucoside
	Naringenin 7-O-rutinoside (narirutin)

## Sheet: D. integrifolium
Terpenoids	Flavonoids	Phenylpropanol	Phenolic acid	Others
3-Carene/Δ-3-Carene				o-Cymene
Aromadendrene
Caryophyllene oxide
cis-α-Bisabolene
Cubenol
Epizonarene
Eucalyptol
Germacrene D
Isopinocamphone
Ledol/(+)-ledol
Linalool
L-Pinocarveol
Myrcene (β-myrcene)
Myrtenal
Myrtenol
Nerolidol
Sabinene
Terpinen-4-ol
Terpinolene
α-Bisabolol
α-Copaene
α-Pinene
α-Terpinene
α-Terpineol
α-Thujene
β-Bisabolene
β-Copaene
β-Elemene
β-Ocimene
β-Pinene
β-Thujene
γ-muurolene
γ-Terpinene
δ-Cadinene

## Sheet: D. nutans
Terpenoids	Flavonoids	Phenylpropanol	Phenolic acid	Others
2α-hydroxy-pinocampheol
2β-hydroxypinocampheol
3-Carene/Δ-3-Carene/car-3-ene
Camphene
Camphor
iso-borneol
iso-pinocampheol
Isopinocamphone/cis-Pinocamphone
Isopulegol
Linalool
Myrcene (β-myrcene)
Myrtenol
para-cymene/p-Cymene
pinocamphone
Sabinene
sabinol/cis-sabinol
t-verbenol
α-Phellandrene
α-Pinene
α-Pinocampheol, acetate
α-Terpineol
α-terpinyl acetate
α-Thujene
α-thujone
β-Pinene
β-Pinocampheol, acetate
γ-Terpinene
bergamotane derivative 2
bergamotane derivative 3
bergamotane derivative 4
3β-hydroxy-2-oxo-1,2,12,13-tetrahydro-bergamotene (bergamotane derivative 1)

[truncated: 11 more sheets: D. palmatum, D. foetidum, D. ruyschiana, D. rupestre, D. taliense, D. komarovi, H. cuspidatus, H. officinalis, H. ambiguus, L. royleana, L. iberica]
